# Supplementary material for: Increasing the qualitative understanding of optimal functionality in older adults: a focus group based study
Source: Springer Nature journal article supplement (doi:10.1186/s12877-016-0244-z), 2016-03-23
Supplement: MOESM1 [file 9739026]

## Additional file 1. Complete overview of the FGD analysis, results from SLH group 1

| Main categories                                                | Generic categories                  | Sub-categories                                         | Meaning Units                                                        |                                            |
|----------------------------------------------------------------|-------------------------------------|--------------------------------------------------------|----------------------------------------------------------------------|--------------------------------------------|
| <b>Body-related factors</b>                                    | Activity Aspects                    | Physical Activity                                      | <i>Move about at home</i>                                            |                                            |
|                                                                |                                     |                                                        | <i>Gymnastics on Fridays feels good</i>                              |                                            |
|                                                                |                                     |                                                        | <i>Important to move about</i>                                       |                                            |
|                                                                | Autonomy Aspects                    | Being able to move (new)                               | <i>Being able to move</i>                                            |                                            |
|                                                                |                                     |                                                        | <i>Getting up in the morning</i>                                     |                                            |
|                                                                |                                     |                                                        | <i>Being able to walk outdoors</i><br><i>It's good to move about</i> |                                            |
|                                                                | Health Aspects                      | Free from disease (new)                                | <i>To be healthy</i>                                                 |                                            |
|                                                                |                                     |                                                        | <i>Being free from disease and misery</i>                            |                                            |
|                                                                |                                     |                                                        | <i>Being free from ailments</i>                                      |                                            |
|                                                                |                                     | Gut Health                                             | <i>Important to have good bowel movement</i>                         |                                            |
| <i>If you move about (walking) bowel movement will be good</i> |                                     |                                                        |                                                                      |                                            |
| <b>Self-related factors</b>                                    | Adjustment Aspects                  | Healthy food (new)                                     | <i>Nutritious food</i>                                               |                                            |
|                                                                |                                     |                                                        | <i>Food is of importance</i>                                         |                                            |
|                                                                |                                     | Subjective Health                                      | <i>To feel well/healthy</i>                                          |                                            |
|                                                                |                                     |                                                        | Gratitude (new)                                                      | <i>Gratitude for having an attendant</i>   |
|                                                                |                                     | <i>Feeling spared (from misery)</i>                    |                                                                      |                                            |
|                                                                | <i>To have tasty food</i>           |                                                        |                                                                      |                                            |
|                                                                | <b>External Factors</b>             | Demographic Aspects                                    | Economy                                                              | <i>To be able to afford (an attendant)</i> |
|                                                                |                                     |                                                        |                                                                      | Environmental Aspects                      |
|                                                                |                                     | <i>Happy to have an attendant</i>                      |                                                                      |                                            |
|                                                                |                                     | <i>Receiving help in the dining hall if needed</i>     |                                                                      |                                            |
| Assistive tools (new)                                          |                                     | <i>Amenities that have arrived and improved health</i> |                                                                      |                                            |
|                                                                | <i>Assistive tools in the homes</i> |                                                        |                                                                      |                                            |
| Thriving at home (new)                                         | <i>A very good place to live</i>    |                                                        |                                                                      |                                            |
