# Supplementary material for: Increasing the qualitative understanding of optimal functionality in older adults: a focus group based study
Source: Springer Nature journal article supplement (doi:10.1186/s12877-016-0244-z), 2016-03-23
Supplement: MOESM2 [file 9739026]

## Additional file 2. Complete overview of the FGD analysis, results from SLH group 2

| Main categories             | Generic categories    | Sub-categories            | Meaning Units                                                                                                                                                                                                                                         |
|-----------------------------|-----------------------|---------------------------|-------------------------------------------------------------------------------------------------------------------------------------------------------------------------------------------------------------------------------------------------------|
| <b>Body-related factors</b> | Activity Aspects      | Physical Activity         | <i>Walking in the corridors</i><br><i>Good to move about</i><br><i>Keep up (moving) as well as you can</i><br><i>Walk a bit everyday/daily</i>                                                                                                        |
|                             | Health Aspects        | Being able to move (new)  | <i>As long as you can get up in the morning</i><br><i>To be able to dress (your self)</i>                                                                                                                                                             |
|                             |                       | Healthy food (new)        | <i>We eat "real" food</i><br><i>Always eat on a regular basis (food)</i>                                                                                                                                                                              |
| <b>Self-related factors</b> | Adjustment Aspects    | Active adjustment (new)   | <i>To solve crossword puzzles and read book when you no longer are able to do needlework</i>                                                                                                                                                          |
|                             | Capability Aspects    | Acts of kindness (new)    | <i>Funds</i><br><i>Do some work (charity)</i>                                                                                                                                                                                                         |
|                             |                       | Cultural Activity (new)   | <i>To watch TV when it is sports</i><br><i>Listening to music is nice</i><br><i>To listen to rock-music</i><br><i>Solving cross-word puzzles</i><br><i>Reading books</i><br><i>You get what you need (right here) instead of going somewhere else</i> |
| <b>External Factors</b>     | Environmental Aspects | Accessible health care    | <i>They walk outside together with those who cannot do it by themselves</i>                                                                                                                                                                           |
|                             |                       | Assisted care             | <i>Having the "walker" to hold on to</i>                                                                                                                                                                                                              |
|                             |                       | Assistive tools (new)     | <i>The medical care here is extremely good</i>                                                                                                                                                                                                        |
|                             |                       | High quality medical care | <i>Everything is really good (health-care personnel, dining hall)</i>                                                                                                                                                                                 |
|                             |                       | Thriving at home (new)    | <i>Solgården is the best among senior living homes)</i><br><i>To sit, drink coffee and talk</i>                                                                                                                                                       |
|                             | Social Aspects        | Social activity           | <i>Walking in the corridors and meeting people</i><br><i>Entertainment and coffee-drinking</i>                                                                                                                                                        |
