# Supplementary material for: Increasing the qualitative understanding of optimal functionality in older adults: a focus group based study
Source: Springer Nature journal article supplement (doi:10.1186/s12877-016-0244-z), 2016-03-23
Supplement: MOESM3 [file 9739026]

### Additional file 3. Complete overview of the FGD analysis, results from FL group 1

| Main categories                                           | Generic categories | Sub-categories                      | Meaning Units                                                                       |
|-----------------------------------------------------------|--------------------|-------------------------------------|-------------------------------------------------------------------------------------|
| <b>Body-related factors</b>                               | Activity Aspects   | Maintaining Physical Ability (new)  | <i>As long as I can move about and nothing prevents that</i>                        |
|                                                           |                    | Autonomy Aspects                    | <i>We become dependent of other people's services in order to feel well</i>         |
|                                                           | Health Aspects     | Dependence (new)                    | <i>Good enough balance</i>                                                          |
|                                                           |                    | Function                            | <i>To maintain/keep stomach and bowels in good condition</i>                        |
|                                                           |                    | Gut Health (new)                    | <i>Pull apart the blinds</i>                                                        |
|                                                           |                    | Maintenance of daily routines (new) | <i>Dancing is fun (as physical activity)</i>                                        |
|                                                           |                    | Physical Activity                   | <i>Important to take care of your self for as long as possible</i>                  |
|                                                           |                    | Staying independent                 | <i>It's all well if you get to be healthy/well</i>                                  |
|                                                           |                    | Subjective Health                   | <i>To lie down on the bed- it's nice</i>                                            |
|                                                           |                    | To relax (new)                      | <i>Adjustment to/for needing help</i>                                               |
| <b>Self-related factors</b>                               | Adjustment Aspects | Active adjustment (Independence)    | <i>To manage everything that has to be done (when you live alone/ by your self)</i> |
|                                                           |                    |                                     | <i>To be able to do what I wish/want to do</i>                                      |
|                                                           |                    |                                     | <i>Gymnastics for seniors</i>                                                       |
|                                                           |                    |                                     | <i>The bicycle is a blessing</i>                                                    |
|                                                           |                    |                                     | <i>To be physically active</i>                                                      |
|                                                           |                    |                                     | <i>To go outside and walk</i>                                                       |
|                                                           |                    |                                     | <i>To move about</i>                                                                |
|                                                           |                    |                                     | <i>To ride a bike/cycle</i>                                                         |
|                                                           |                    |                                     | <i>To take a walk</i>                                                               |
|                                                           |                    |                                     | <i>To take care of your garden and do gardening</i>                                 |
|                                                           |                    |                                     | <i>To take out your bicycle</i>                                                     |
|                                                           |                    |                                     | <i>To work out at a gym</i>                                                         |
|                                                           |                    |                                     | <i>To be able to bring in the newspaper</i>                                         |
|                                                           |                    |                                     | <i>To be able to get up in the morning</i>                                          |
|                                                           |                    |                                     | <i>To be able to go down the stairs</i>                                             |
|                                                           |                    |                                     | <i>To be able to let the cat outside</i>                                            |
|                                                           |                    |                                     | <i>To be able to make coffee</i>                                                    |
|                                                           |                    |                                     | <i>It is disabling to loose you ability to read (impaired vision)</i>               |
|                                                           |                    |                                     | <i>Stiffness/rigidity</i>                                                           |
| <i>Takes longer time to warm up the muscles</i>           |                    |                                     |                                                                                     |
| <i>The balance is not on top</i>                          |                    |                                     |                                                                                     |
| <i>The musculature turns/gets stiff</i>                   |                    |                                     |                                                                                     |
| <i>Vision is very important in order to see and read</i>  |                    |                                     |                                                                                     |
| <i>Maintaining your health</i>                            |                    |                                     |                                                                                     |
| <i>When I'm ill, I'm not happy</i>                        |                    |                                     |                                                                                     |
| <i>To rest and pause/take a break</i>                     |                    |                                     |                                                                                     |
| <i>Wonderful to just lie still/be still</i>               |                    |                                     |                                                                                     |
| <i>You have to rest in between (turns)</i>                |                    |                                     |                                                                                     |
| <i>Difficult not to manage everyday life by your self</i> |                    |                                     |                                                                                     |
| <i>To learn that you are dependent of others</i>          |                    |                                     |                                                                                     |
| <i>You have to adjust to your age</i>                     |                    |                                     |                                                                                     |
| <i>You have to make it comfortable for your self</i>      |                    |                                     |                                                                                     |

|                         |                                         |                                    |                                                                                                                                                                                                                                                                                          |                                                                                                                                                                                                                                                  |
|-------------------------|-----------------------------------------|------------------------------------|------------------------------------------------------------------------------------------------------------------------------------------------------------------------------------------------------------------------------------------------------------------------------------------|--------------------------------------------------------------------------------------------------------------------------------------------------------------------------------------------------------------------------------------------------|
| <b>External Factors</b> | Environmental Aspects<br>Social Aspects | Capability Aspects                 | Act of kindness (new)                                                                                                                                                                                                                                                                    | <i>I like helping others</i><br><i>It is easier to help people and be there for them</i><br><i>To do a good deed</i><br><i>To help others is uplifting</i><br><i>To help out with homework</i><br><i>To work as volunteer gives satisfaction</i> |
|                         |                                         | Awareness by external events (new) | <i>Satisfaction to immerse your self into nature shows on TV</i><br><i>To step outside your self for a while</i><br><i>To turn out side yourself</i>                                                                                                                                     |                                                                                                                                                                                                                                                  |
|                         |                                         | Cultural activity (new)            | <i>Go to the movies/cinema, lectures</i><br><i>It is an experience to see Flashdance (the show)</i><br><i>Listen to music</i><br><i>Music</i><br><i>Reading books</i><br><i>The most important things is to read</i><br><i>Watch TV that provides (knowledge) e.g. Discovery Channel</i> |                                                                                                                                                                                                                                                  |
|                         |                                         | Inner resources                    | <i>Engage in things</i><br><i>Get out and do things whatever the weather</i><br><i>Keeping the brain active by cross word puzzles/Sudoku</i>                                                                                                                                             |                                                                                                                                                                                                                                                  |
|                         |                                         | Learning new things                | <i>To learn things</i><br><i>To have the desire to learn things</i><br><i>To be motivated to learn things</i>                                                                                                                                                                            |                                                                                                                                                                                                                                                  |
|                         |                                         | Positive attitude (new)            | <i>To feel happy</i><br><i>To be positive</i><br><i>A sense of spirituality is important</i>                                                                                                                                                                                             |                                                                                                                                                                                                                                                  |
|                         |                                         | Spirituality                       | <i>To light a candle in church</i>                                                                                                                                                                                                                                                       |                                                                                                                                                                                                                                                  |
|                         |                                         | To experience Nature (new)         | <i>To experience the best sides of all seasons</i>                                                                                                                                                                                                                                       |                                                                                                                                                                                                                                                  |
|                         |                                         | To have goals (new)                | <i>To succeed with things you have planned</i>                                                                                                                                                                                                                                           |                                                                                                                                                                                                                                                  |
|                         |                                         | To thrive (new)                    | <i>To be wealthy and thrive with (your) life</i>                                                                                                                                                                                                                                         |                                                                                                                                                                                                                                                  |
|                         |                                         | Family (new)                       | <i>Children</i><br><i>Family</i><br><i>Friends</i><br><i>Grandchildren</i><br><i>Relatives</i><br><i>The happiness of having children and grandchildren</i>                                                                                                                              |                                                                                                                                                                                                                                                  |
|                         |                                         | Interacting with younger people    | <i>I feel good when I get to be together with young people</i><br><i>One of my best moments is when I sit down with a bunch of adolescents (young people) and help them</i>                                                                                                              |                                                                                                                                                                                                                                                  |
|                         |                                         | Social activities                  | <i>Social encounters are important</i><br><i>To do things together with other</i><br><i>To experience things together with someone</i><br><i>You should/have to get out and mix with people for as long as you can</i>                                                                   |                                                                                                                                                                                                                                                  |
|                         |                                         | Social relations/network (new)     | <i>Good relations with neighbors</i><br><i>Good relations are very stimulating</i><br><i>I enjoy spending time with my neighbors and friends</i><br><i>You wish/want to be needed</i>                                                                                                    |                                                                                                                                                                                                                                                  |

Still being important to others

*To be needed by someone else*

*To help them in need*

*To help those that are in worse condition*
