# Supplementary material for: Increasing the qualitative understanding of optimal functionality in older adults: a focus group based study
Source: Springer Nature journal article supplement (doi:10.1186/s12877-016-0244-z), 2016-03-23
Supplement: MOESM4 [file 9739026]

## Additional file 4. Complete overview of the FGD analysis, results from FL group 2

| Main categories                                                    | Generic categories                                          | Sub-categories            | Meaning Units                                    |
|--------------------------------------------------------------------|-------------------------------------------------------------|---------------------------|--------------------------------------------------|
| Body-related factors                                               | Activity Aspects                                            | Physical Activity         | <i>Go out for a bike ride</i>                    |
|                                                                    |                                                             |                           | <i>I am physically active/I move about</i>       |
|                                                                    |                                                             |                           | <i>I do gymnastics</i>                           |
|                                                                    |                                                             |                           | <i>Kept up the exercise</i>                      |
|                                                                    |                                                             |                           | <i>To keep up</i>                                |
|                                                                    |                                                             |                           | <i>To move about/ to exercise</i>                |
|                                                                    | Health Aspects                                              | To occupy one self (new)  | <i>To work in garden</i>                         |
|                                                                    |                                                             |                           | <i>To have something to do</i>                   |
|                                                                    |                                                             | Physical function (new)   | <i>You occupy your self all day</i>              |
|                                                                    |                                                             |                           | <i>The body does what you want it to do</i>      |
|                                                                    |                                                             |                           | <i>To be able to do what you want</i>            |
|                                                                    |                                                             | Gut health (new)          | <i>To feel that the stomach works properly</i>   |
|                                                                    |                                                             |                           | <i>That the stomach feels fine</i>               |
| Healthy food (new)                                                 | <i>Eating the right things</i>                              |                           |                                                  |
|                                                                    | <i>Healthy food</i>                                         |                           |                                                  |
|                                                                    | <i>Keeping the blood sugar on a reasonable level</i>        |                           |                                                  |
| Subjective health                                                  | <i>No ailments</i>                                          |                           |                                                  |
|                                                                    | <i>No being in any kind of pain</i>                         |                           |                                                  |
| Self-related factors                                               | Capability Aspects                                          | Being content (new)       | <i>To feel healthy</i>                           |
|                                                                    |                                                             |                           | <i>To be content with life</i>                   |
|                                                                    |                                                             | Cultural activities (new) | <i>To be content with your self</i>              |
|                                                                    |                                                             |                           | <i>I read quite a lot</i>                        |
|                                                                    |                                                             |                           | <i>Music</i>                                     |
|                                                                    |                                                             |                           | <i>Nice to get away (travel)</i>                 |
|                                                                    |                                                             |                           | <i>Solving cross word puzzles</i>                |
|                                                                    |                                                             |                           | <i>To attend a show/performance of some kind</i> |
|                                                                    |                                                             |                           | <i>To be curious about other people</i>          |
|                                                                    |                                                             |                           | <i>Genealogy research</i>                        |
|                                                                    |                                                             |                           | <i>Have a fun hobby</i>                          |
|                                                                    |                                                             |                           | <i>Hunting</i>                                   |
|                                                                    |                                                             | <i>Just do fun things</i> |                                                  |
| Curiosity for others (new)<br>Engaging in lustful activities (new) | <i>Made a lot of bird feeders</i>                           |                           |                                                  |
|                                                                    | <i>Own a dog</i>                                            |                           |                                                  |
|                                                                    | <i>To do something that you perceive as fun</i>             |                           |                                                  |
| Enjoying life                                                      | <i>Wild life management</i>                                 |                           |                                                  |
|                                                                    | <i>To enjoy</i>                                             |                           |                                                  |
| Gratitude                                                          | <i>To enjoy doing things makes you feel healthier</i>       |                           |                                                  |
|                                                                    | <i>Grateful for each day you are able to get out of bed</i> |                           |                                                  |
|                                                                    | <i>Life is good</i>                                         |                           |                                                  |
| Positive attitude (new)                                            | <i>To feel grateful</i>                                     |                           |                                                  |
|                                                                    | <i>Be nice to others</i>                                    |                           |                                                  |
|                                                                    | <i>Be nice to your self</i>                                 |                           |                                                  |
|                                                                    |                                                             |                           | <i>Be positive</i>                               |

|                  |                       |                                       |                                                                                                                                                                                                                                                                                                                                                                                                                                                                                 |
|------------------|-----------------------|---------------------------------------|---------------------------------------------------------------------------------------------------------------------------------------------------------------------------------------------------------------------------------------------------------------------------------------------------------------------------------------------------------------------------------------------------------------------------------------------------------------------------------|
|                  |                       |                                       | <p><i>No to get annoyed/irritated by other people</i></p> <p><i>Smile to people makes you happy</i></p> <p><i>To be able to forgive your self and others</i></p> <p><i>Have something to look forward to</i></p> <p><i>To think ahead</i></p> <p><i>What you have to look forward to</i></p>                                                                                                                                                                                    |
|                  |                       | The ability to look forward to things |                                                                                                                                                                                                                                                                                                                                                                                                                                                                                 |
|                  |                       | To experience nature (new)            | <p><i>I love the forest</i></p> <p><i>Nature</i></p> <p><i>The sun</i></p> <p><i>To feel united with nature</i></p> <p><i>To get the feeling that you are one with all of it (nature)</i></p> <p><i>To walk around in the forest and picking mushrooms</i></p> <p><i>To manage well economically</i></p>                                                                                                                                                                        |
| External Factors | Demographic Aspects   | Economy                               |                                                                                                                                                                                                                                                                                                                                                                                                                                                                                 |
|                  | Environmental Aspects | Modern technology (new)               | <p><i>It has endless possibilities (the tablet)</i></p> <p><i>One of these iPhones any idiot can (manage), it's enough just to look at it</i></p> <p><i>Smartphone is easy (to use)</i></p> <p><i>The smart tablet does what I want it to do</i></p> <p><i>The smart tablet thinks as my brain</i></p> <p><i>To be positive about modern technology</i></p> <p><i>To see the possibilities (with modern technology)</i></p> <p><i>You can do so much with a smart phone</i></p> |
|                  | Social Aspects        | Thriving at home (new)                | <i>Fun/feels good to come home (from trips)</i>                                                                                                                                                                                                                                                                                                                                                                                                                                 |
|                  |                       | Family (new)                          | <p><i>Having a god family relationship</i></p> <p><i>To feel good with the people that are around you</i></p> <p><i>To play with the grandchildren</i></p> <p><i>You (rather) want to do something with them (children and grandchildren)</i></p> <p><i>You have good friends and neighbors</i></p>                                                                                                                                                                             |
|                  |                       | Feeling safe with your network (new)  | <p><i>To feel safe by having contacts</i></p> <p><i>To get help if you need it (by social network)</i></p>                                                                                                                                                                                                                                                                                                                                                                      |
|                  |                       | Social network                        | <p><i>A lot of fun to go out with friends</i></p> <p><i>Coworkers</i></p> <p><i>The importance of social (network)</i></p> <p><i>The social network is quite important</i></p> <p><i>To manage well socially</i></p>                                                                                                                                                                                                                                                            |
