# Supplementary material for: Increasing the qualitative understanding of optimal functionality in older adults: a focus group based study
Source: Springer Nature journal article supplement (doi:10.1186/s12877-016-0244-z), 2016-03-23
Supplement: MOESM5 [file 9739026]

## Additional file 5. Complete overview of the FGD analysis, results from SA group 1

| Main categories             | Generic categories               | Sub-categories                                                  | Meaning Units                                                 |                                                                          |                                                   |                                                          |                                                      |
|-----------------------------|----------------------------------|-----------------------------------------------------------------|---------------------------------------------------------------|--------------------------------------------------------------------------|---------------------------------------------------|----------------------------------------------------------|------------------------------------------------------|
| <b>Body-related factors</b> | Activity Aspects                 | Physical Activity                                               | <i>Go for a morning walk</i>                                  |                                                                          |                                                   |                                                          |                                                      |
|                             |                                  |                                                                 | <i>Out running in the woods</i>                               |                                                                          |                                                   |                                                          |                                                      |
|                             |                                  |                                                                 | <i>To be able to use your legs</i>                            |                                                                          |                                                   |                                                          |                                                      |
|                             |                                  |                                                                 | <i>To be able to walk</i>                                     |                                                                          |                                                   |                                                          |                                                      |
|                             |                                  |                                                                 | <i>To be able to walk and run</i>                             |                                                                          |                                                   |                                                          |                                                      |
|                             |                                  |                                                                 | <i>To move about</i>                                          |                                                                          |                                                   |                                                          |                                                      |
|                             |                                  |                                                                 | <i>To move about is good</i>                                  |                                                                          |                                                   |                                                          |                                                      |
|                             |                                  |                                                                 | <i>When running my quick round (it feels good)</i>            |                                                                          |                                                   |                                                          |                                                      |
|                             |                                  |                                                                 | <i>Wonderful to walk, jog a little</i>                        |                                                                          |                                                   |                                                          |                                                      |
|                             |                                  |                                                                 | <i>Feels good when you've made an effort</i>                  |                                                                          |                                                   |                                                          |                                                      |
|                             | Autonomy Aspects                 | Physical exertion (new)                                         | <i>The satisfaction that comes when you've made an effort</i> |                                                                          |                                                   |                                                          |                                                      |
|                             |                                  |                                                                 | <i>You push (the body) as much as you can</i>                 |                                                                          |                                                   |                                                          |                                                      |
|                             |                                  |                                                                 | <i>To be able to do you usual things</i>                      |                                                                          |                                                   |                                                          |                                                      |
| Health Aspects              | Maintaining daily routines (new) | <i>To get out of bed in the morning</i>                         |                                                               |                                                                          |                                                   |                                                          |                                                      |
|                             |                                  | <i>As long as I'm healthy I want to be in charge of my self</i> |                                                               |                                                                          |                                                   |                                                          |                                                      |
|                             | Staying independent (new)        | <i>To be able to make your own decision</i>                     |                                                               |                                                                          |                                                   |                                                          |                                                      |
|                             |                                  | <i>To eat a lot of vegetables</i>                               |                                                               |                                                                          |                                                   |                                                          |                                                      |
|                             |                                  | <i>To eat wisely (more vegetables)</i>                          |                                                               |                                                                          |                                                   |                                                          |                                                      |
| <b>Self-related factors</b> | Adjustment Aspects               | Healthy food (new)                                              | <i>To lie down for a moment everyday</i>                      |                                                                          |                                                   |                                                          |                                                      |
|                             |                                  |                                                                 | <i>To sleep several hours at a stretch makes one happy</i>    |                                                                          |                                                   |                                                          |                                                      |
|                             | Capability Aspects               | Sleep (new)                                                     | Subjective health                                             | <i>To be healthy</i>                                                     |                                                   |                                                          |                                                      |
|                             |                                  |                                                                 |                                                               | <i>To feel healthy and strong</i>                                        |                                                   |                                                          |                                                      |
|                             |                                  | Water                                                           | Appreciate everyday life (new)                                | <i>To drink water is of importance</i>                                   |                                                   |                                                          |                                                      |
|                             |                                  |                                                                 |                                                               | <i>You learn to appreciate everyday thing</i>                            |                                                   |                                                          |                                                      |
|                             |                                  | Being content (new)                                             | To accept one self (new)                                      | <i>You learn to appreciate the small things</i>                          |                                                   |                                                          |                                                      |
|                             |                                  |                                                                 |                                                               | <i>Being content with your day</i>                                       |                                                   |                                                          |                                                      |
|                             |                                  | Cultural activity (new)                                         | Act of kindness (new)                                         | Enjoying tasty food (new)                                                | <i>If you have done what you could it is good</i> |                                                          |                                                      |
|                             |                                  |                                                                 |                                                               |                                                                          | <i>To be content</i>                              |                                                          |                                                      |
| Silence (new)               | Act of kindness (new)            |                                                                 | Enjoying tasty food (new)                                     | <i>To accept that you are who you are and that there will be changes</i> |                                                   |                                                          |                                                      |
|                             |                                  |                                                                 |                                                               | <i>To accept that you don't manage (physically) as much as before</i>    |                                                   |                                                          |                                                      |
|                             | Cultural activity (new)          |                                                                 | Act of kindness (new)                                         | Enjoying tasty food (new)                                                | <i>Nice to get out for lunch once in a while</i>  |                                                          |                                                      |
|                             |                                  |                                                                 |                                                               |                                                                          | <i>Satisfactory to help others to succeed</i>     |                                                          |                                                      |
|                             |                                  |                                                                 | Cultural activity (new)                                       | Act of kindness (new)                                                    | Enjoying tasty food (new)                         | <i>Stimulating to help others</i>                        |                                                      |
|                             |                                  |                                                                 |                                                               |                                                                          |                                                   | <i>To do things together in groups give satisfaction</i> |                                                      |
|                             |                                  |                                                                 |                                                               | Cultural activity (new)                                                  | Act of kindness (new)                             | Enjoying tasty food (new)                                | <i>To help kids in the forest (with maps) is fun</i> |
|                             |                                  |                                                                 |                                                               |                                                                          |                                                   |                                                          | <i>Gets happy when listening to jazz</i>             |
| Cultural activity (new)     | Act of kindness (new)            | Enjoying tasty food (new)                                       | <i>Listening to classical music</i>                           |                                                                          |                                                   |                                                          |                                                      |
|                             |                                  |                                                                 | <i>Music is for the soul</i>                                  |                                                                          |                                                   |                                                          |                                                      |
| Cultural activity (new)     | Act of kindness (new)            | Enjoying tasty food (new)                                       | <i>To do oil painting</i>                                     |                                                                          |                                                   |                                                          |                                                      |
|                             |                                  |                                                                 | <i>To go o the theatre</i>                                    |                                                                          |                                                   |                                                          |                                                      |
| Cultural activity (new)     | Act of kindness (new)            | Enjoying tasty food (new)                                       | <i>To rock to music makes you happy</i>                       |                                                                          |                                                   |                                                          |                                                      |
|                             |                                  |                                                                 | <i>Being able to enjoy tasty food with a glass of wine</i>    |                                                                          |                                                   |                                                          |                                                      |
| Cultural activity (new)     | Act of kindness (new)            | Enjoying tasty food (new)                                       | <i>To hear the silence</i>                                    |                                                                          |                                                   |                                                          |                                                      |
|                             |                                  |                                                                 | <i>To hear the silence</i>                                    |                                                                          |                                                   |                                                          |                                                      |

|                         |                       |                                                                                                                                      |                                                                                                                                                                                                                                                                                                                                                                                                                                                                                                                                                                                                                                                                                                                                                                                                                                                                                                                                                                                                                        |
|-------------------------|-----------------------|--------------------------------------------------------------------------------------------------------------------------------------|------------------------------------------------------------------------------------------------------------------------------------------------------------------------------------------------------------------------------------------------------------------------------------------------------------------------------------------------------------------------------------------------------------------------------------------------------------------------------------------------------------------------------------------------------------------------------------------------------------------------------------------------------------------------------------------------------------------------------------------------------------------------------------------------------------------------------------------------------------------------------------------------------------------------------------------------------------------------------------------------------------------------|
|                         |                       |                                                                                                                                      | <p><i>Silence makes you feel well</i></p> <p><i>Feels very good when out in nature</i></p> <p><i>The fragrance of the forest</i></p> <p><i>To be outdoors</i></p> <p><i>To be outdoors in nature</i></p> <p><i>To be outdoors in the forest/woods in the summer and in the winter</i></p> <p><i>To get away from the noise in the city</i></p> <p><i>To hear chirping of birds</i></p> <p><i>To listen to the birds</i></p> <p><i>When it blooms</i></p> <p><i>Wonderful to listen to the Blackbird</i></p>                                                                                                                                                                                                                                                                                                                                                                                                                                                                                                            |
|                         |                       | To experience nature (new)                                                                                                           |                                                                                                                                                                                                                                                                                                                                                                                                                                                                                                                                                                                                                                                                                                                                                                                                                                                                                                                                                                                                                        |
|                         |                       |                                                                                                                                      | <p><i>Satisfaction when you have a goal and when you reach it</i></p> <p><i>There is a drive</i></p>                                                                                                                                                                                                                                                                                                                                                                                                                                                                                                                                                                                                                                                                                                                                                                                                                                                                                                                   |
|                         |                       | To have goals (new)                                                                                                                  |                                                                                                                                                                                                                                                                                                                                                                                                                                                                                                                                                                                                                                                                                                                                                                                                                                                                                                                                                                                                                        |
|                         |                       |                                                                                                                                      | <p><i>To live today and not look back</i></p>                                                                                                                                                                                                                                                                                                                                                                                                                                                                                                                                                                                                                                                                                                                                                                                                                                                                                                                                                                          |
|                         |                       | To live in the presence (new)                                                                                                        |                                                                                                                                                                                                                                                                                                                                                                                                                                                                                                                                                                                                                                                                                                                                                                                                                                                                                                                                                                                                                        |
|                         |                       | To SEE nature (new)                                                                                                                  | <p><i>A delight to the eye when you see a nature scene</i></p> <p><i>Soothing to watch the sunset</i></p> <p><i>To see the colors (in the nature)</i></p>                                                                                                                                                                                                                                                                                                                                                                                                                                                                                                                                                                                                                                                                                                                                                                                                                                                              |
| <b>External Factors</b> | Environmental Aspects | <p>Accessible health care (new)</p> <p>Being content with your housing situation (new)</p>                                           | <p><i>Health care and doctors</i></p> <p><i>Environment/surroundings is important</i></p> <p><i>It is really good where I live</i></p> <p><i>The housing situation means a lot</i></p> <p><i>To be grateful for your housing situation</i></p>                                                                                                                                                                                                                                                                                                                                                                                                                                                                                                                                                                                                                                                                                                                                                                         |
|                         | Social Aspects        | <p>Modern Technology (new)</p> <p>Being important to others</p> <p>Family (new)</p> <p>Food (new)</p> <p>Social activities (new)</p> | <p><i>There are both upsides and downsides with modern technology</i></p> <p><i>We benefit from the rapid development of technology, it increases our chances to survive</i></p> <p><i>Satisfactory to know that you will be missed if you are not there</i></p> <p><i>To receive satisfaction from others</i></p> <p><i>You feel that you are needed</i></p> <p><i>Fun to see the grandchildren</i></p> <p><i>Positive to have family, children, and grandchildren</i></p> <p><i>To hug your grandchildren</i></p> <p><i>It always tastes better to eat together with someone</i></p> <p><i>Tasty food is a social matter</i></p> <p><i>Be involved in social interactions</i></p> <p><i>Enjoy meeting people</i></p> <p><i>Go out together</i></p> <p><i>It's never dull to spend time with (these) friends</i></p> <p><i>Spend time with young orienteers</i></p> <p><i>The social part of meeting people is very important</i></p> <p><i>To talk to people</i></p> <p><i>You receive more and more friends</i></p> |
