# Supplementary material for: Increasing the qualitative understanding of optimal functionality in older adults: a focus group based study
Source: Springer Nature journal article supplement (doi:10.1186/s12877-016-0244-z), 2016-03-23
Supplement: MOESM6 [file 9739026]

## Additional file 6. Complete overview of the FGD analysis, results from SA group 2

| Main categories                                    | Generic categories | Sub-categories           | Meaning Units                                                        |                                                      |
|----------------------------------------------------|--------------------|--------------------------|----------------------------------------------------------------------|------------------------------------------------------|
| <b>Body-related factors</b>                        | Activity Aspects   | Physical Activity        | <i>Cross-country skiing</i>                                          |                                                      |
|                                                    |                    |                          | <i>Exercise</i>                                                      |                                                      |
|                                                    |                    |                          | <i>Hiking in Kilsbergen if the weather is right</i>                  |                                                      |
|                                                    |                    |                          | <i>Nice to bicycle along the rivers</i>                              |                                                      |
|                                                    |                    |                          | <i>Take a walk everyday before breakfast</i>                         |                                                      |
|                                                    |                    |                          | <i>To be out on the golf course for a few hours</i>                  |                                                      |
|                                                    |                    |                          | <i>To find control points in the forest</i>                          |                                                      |
|                                                    |                    |                          | <i>To move about</i>                                                 |                                                      |
|                                                    |                    |                          | <i>To take walks in the forest</i>                                   |                                                      |
|                                                    |                    |                          | <i>You have to keep moving about</i>                                 |                                                      |
| <b>Self-related factors</b>                        | Health Aspects     | Annual health check      | <i>Attend to annual health check</i>                                 |                                                      |
|                                                    |                    | Healthy food (new)       | <i>Eat as healthy as possible</i>                                    |                                                      |
|                                                    |                    |                          | <i>You have to eat right</i>                                         |                                                      |
|                                                    |                    | Not to be stressed (new) | <i>Important to not be stressed</i>                                  |                                                      |
|                                                    |                    | Subjective health        | <i>To be healthy</i>                                                 |                                                      |
|                                                    |                    | Adjustment Aspects       | To have time (new)                                                   | <i>To have time to do things</i>                     |
|                                                    |                    |                          |                                                                      | <i>To own your time</i>                              |
|                                                    |                    | Capability Aspects       | Cultural Activity (new)                                              | <i>Beautiful music</i>                               |
|                                                    |                    |                          |                                                                      | <i>Culture</i>                                       |
|                                                    |                    |                          |                                                                      | <i>Dancing</i>                                       |
| <i>Music</i>                                       |                    |                          |                                                                      |                                                      |
| <i>Nice trips</i>                                  |                    |                          |                                                                      |                                                      |
| <i>Read books</i>                                  |                    |                          |                                                                      |                                                      |
| <i>Take classes</i>                                |                    |                          |                                                                      |                                                      |
| <i>Tasty food</i>                                  |                    |                          |                                                                      |                                                      |
| <i>To attend a concert</i>                         |                    |                          |                                                                      |                                                      |
| <i>To be involved in a non-profit organization</i> |                    |                          |                                                                      |                                                      |
| <b>Self-related factors</b>                        | Adjustment Aspects | To have time (new)       | <i>To travel</i>                                                     |                                                      |
|                                                    |                    |                          | <i>Watch a movie</i>                                                 |                                                      |
|                                                    |                    |                          | Engaging in lustful activities (new)                                 | <i>Do things that are perceived as fun</i>           |
|                                                    |                    |                          | <i>Engage in things that are pleasurable</i>                         |                                                      |
|                                                    |                    |                          | Experience new things (new)                                          | <i>Do things that you haven't done before</i>        |
|                                                    |                    |                          | <i>Experience new things</i>                                         |                                                      |
|                                                    |                    |                          | <i>Experience new places</i>                                         |                                                      |
|                                                    |                    |                          | Positive attitude (new)                                              | <i>To possess a positive attitude (towards life)</i> |
|                                                    |                    |                          | To be committed (new)                                                | <i>To have a commitment (to things?)</i>             |
|                                                    |                    |                          | “To create” food (new)                                               | <i>Cooking is a lot of fun</i>                       |
| <b>Self-related factors</b>                        | Adjustment Aspects | To have time (new)       | <i>Satisfactory when you are able to grow your own food</i>          |                                                      |
|                                                    |                    |                          | To enjoy the presence (new)                                          | <i>Enjoy for as long as you can</i>                  |
|                                                    |                    |                          | <i>Enjoy the moment</i>                                              |                                                      |
|                                                    |                    |                          | <i>Take pleasure in the little things</i>                            |                                                      |
|                                                    |                    |                          | <i>Take the opportunity and enjoy for as long as you are healthy</i> |                                                      |
|                                                    |                    |                          | To experience nature (new)                                           | <i>Be fond of nature</i>                             |

|                         |                       |                        |                                                                      |
|-------------------------|-----------------------|------------------------|----------------------------------------------------------------------|
|                         |                       |                        | <i>Be outdoors in daylight</i>                                       |
|                         |                       |                        | <i>Get outdoors and just enjoy your self</i>                         |
|                         |                       |                        | <i>Listen to birdsong</i>                                            |
|                         |                       |                        | <i>Satisfactory when you have done something good</i>                |
|                         |                       |                        | <i>Sit outdoors and have a coffee</i>                                |
|                         |                       |                        | <i>To be outdoors a lot</i>                                          |
|                         |                       |                        | <i>Walk about in the forest/woods</i>                                |
|                         |                       |                        | <i>Walk around in the forest and pick berries</i>                    |
|                         |                       | To have goals (new)    | <i>To have a goal</i>                                                |
|                         |                       | To SEE nature (new)    | <i>It's the nicest thing in the spring when you see the greenery</i> |
| <b>External Factors</b> | Environmental Aspects | Thriving at home (new) | <i>Delightful to be at home</i>                                      |
|                         |                       |                        | <i>Nice to be at home</i>                                            |
|                         |                       |                        | <i>To thrive where you live</i>                                      |
|                         |                       |                        | <i>We have a covered terrace that I love</i>                         |
|                         | Social Aspects        | Family (new)           | <i>Children</i>                                                      |
|                         |                       |                        | <i>Grandchildren</i>                                                 |
|                         |                       |                        | <i>To be together with the grandchildren</i>                         |
|                         |                       | Social relations (new) | <i>Feels nice at home</i>                                            |
|                         |                       |                        | <i>Good to have contacts</i>                                         |
|                         |                       |                        | <i>Nice friends</i>                                                  |
