# Supplementary material for: Increasing the qualitative understanding of optimal functionality in older adults: a focus group based study
Source: Springer Nature journal article supplement (doi:10.1186/s12877-016-0244-z), 2016-03-23
Supplement: MOESM7 [file 9739026]

Additional file 7. Consolidated criteria for reporting qualitative studies (COREQ): 32-item checklist

**Manuscript: Increasing the qualitative understanding of optimal functionality in older adults: a focus group based study**

Samal Algilani<sup>1</sup>, Lina Östlund-Lagerström<sup>1,2</sup>, Ida Schoultz<sup>1,2</sup>, Robert J. Brummer<sup>1,2</sup>, Annica Kihlgren<sup>1</sup>

<sup>1</sup>Nutrition and Physical Activity Research Centre and <sup>2</sup>Nutrition Gut Brain Interactions Research Centre, School of Health and Medical Sciences, Örebro University, S-701 82, Örebro, Sweden

**Consolidated criteria for reporting qualitative studies (COREQ): 32-item checklist**

Developed from:

Tong A, Sainsbury P, Craig J. Consolidated criteria for reporting qualitative research (COREQ): a 32-item checklist for interviews and focus groups. *International Journal for Quality in Health Care*. 2007. Volume 19, Number 6: pp. 349 – 357

| No. Item                                       | Guide questions/description                            | Response                                                                                                                                     |
|------------------------------------------------|--------------------------------------------------------|----------------------------------------------------------------------------------------------------------------------------------------------|
| <b>Domain 1: Research team and reflexivity</b> |                                                        |                                                                                                                                              |
| <i>Personal Characteristics</i>                |                                                        |                                                                                                                                              |
| 1. Inter viewer/facilitator                    | Which author/s conducted the interview or focus group? | Samal Algilani (SA), Lina Östlund-Lagerström (LÖL), Ida Schoultz (IS), Annica Kihlgren (AK).                                                 |
| 2. Credentials                                 | What were the researcher's credentials? E.g. PhD, MD   | SA: PhD-student, registered nurse (RN), LÖL: PhD-student, MSc sport science, IS: PhD, AK: Professor, (RN), Robert J. Brummer: Professor, MD. |
| 3. Occupation                                  | What was their occupation at the time of the study?    | AS: PhD-student, LÖL: PhD-student, IS: Assistant professor, AK: Professor, Robert J. Brummer: Professor, MD.                                 |
| 4. Gender                                      | Was the researcher male or female?                     | Four were female, 1 was male.                                                                                                                |
| 5. Experience and training                     | What experience or training did the researcher have?   | SA: MSc in Psychiatric Nursing, RN<br>LÖL: MSc in Sport Science                                                                              |

|                                             |                                                                                                                                           |                                                                                                                                                                                                                                                                                                                                                                                             |
|---------------------------------------------|-------------------------------------------------------------------------------------------------------------------------------------------|---------------------------------------------------------------------------------------------------------------------------------------------------------------------------------------------------------------------------------------------------------------------------------------------------------------------------------------------------------------------------------------------|
|                                             |                                                                                                                                           | IS: PhD in Biomedicine<br>AK: Prof. in Care Science, has performed multiple FGD and interview studies,<br>Robert J. Brummer: Prof. in Medicine, MD (gastroenterology).                                                                                                                                                                                                                      |
| <i>Relationship with participants</i>       |                                                                                                                                           |                                                                                                                                                                                                                                                                                                                                                                                             |
| 6. Relationship established                 | Was a relationship established prior to study commencement?                                                                               | The older adults invited to participate in this study were selected from an already existing cohort of older adults, available within the Nutrition and Physical Activity research Centre at Örebro University. The cohort constituted a large number of older individuals who previously had given their consent to participate in interviews and discussions about health and well-being. |
| 7. Participant knowledge of the interviewer | What did the participants know about the researcher? e.g. personal goals, reasons for doing the research                                  | The participants were introduced to the researchers and informed about the study purpose and design via information meetings or an informational letter, see manuscript in the method section/ <i>selection criteria</i> .                                                                                                                                                                  |
| 8. Interviewer characteristics              | What characteristics were reported about the interviewer/facilitator? e.g. Bias, assumptions, reasons and interests in the research topic | The FGD moderators introduced themselves at the beginning of each FGD, by name, occupation and educational status. The participants were briefly introduced to the purpose of our research by the presentation of the results from our previously published paper on the topic of optimal functionality, see reference no. 8.                                                               |

|                                          |                                                                                                                                                          |                                                                                      |
|------------------------------------------|----------------------------------------------------------------------------------------------------------------------------------------------------------|--------------------------------------------------------------------------------------|
| <b>Domain 2: study design</b>            |                                                                                                                                                          |                                                                                      |
| <i>Theoretical framework</i>             |                                                                                                                                                          |                                                                                      |
| 9. Methodological orientation and Theory | What methodological orientation was stated to underpin the study? e.g. grounded theory, discourse analysis, ethnography, phenomenology, content analysis | See manuscript in the method section/ <i>study design</i> and <i>data analysis</i> . |
| <i>Participant selection</i>             |                                                                                                                                                          |                                                                                      |
| 10. Sampling                             | How were participants selected? e.g. purposive, convenience, consecutive, snowball                                                                       | See manuscript in the method section/ <i>selection criteria</i> .                    |
| 11. Method of approach                   | How were participants approached? e.g. face-to-face, telephone, mail, email                                                                              | See manuscript in the method section/ <i>selection criteria</i> .                    |

|                                        |                                                                                   |                                                                                                    |
|----------------------------------------|-----------------------------------------------------------------------------------|----------------------------------------------------------------------------------------------------|
| 12. Sample size                        | How many participants were in the study?                                          | See manuscript in the method section/<br><i>selection criteria</i> .                               |
| 13. Non-participation                  | How many people refused to participate or dropped out? Reasons?                   | See manuscript in the method section/<br><i>selection criteria</i> .                               |
| <i>Setting</i>                         |                                                                                   |                                                                                                    |
| 14. Setting of data collection         | Where was the data collected? e.g. home, clinic, workplace                        | See manuscript in the method section/<br><i>Data collection - The FGDs</i> .                       |
| 15. Presence of non-participants       | Was anyone else present besides the participants and researchers?                 | No.                                                                                                |
| 16. Description of sample              | What are the important characteristics of the sample? e.g. demographic data, date | See manuscript in the method section/<br><i>selection criteria</i> and Table 1.                    |
| <i>Data collection</i>                 |                                                                                   |                                                                                                    |
| 17. Interview guide                    | Were questions, prompts, guides provided by the authors? Was it pilot tested?     | See manuscript in the method section/<br><i>data collection – Developing the interview guide</i> . |
| 18. Repeat interviews                  | Were repeat interview carried out? If yes, how many?                              | No.                                                                                                |
| 19. Audio/visual recording             | Did the research use audio or visual recording to collect the data?               | See manuscript in the method section/<br><i>data analysis</i> .                                    |
| 20. Field notes                        | Were field notes made during and/or after the interview or focus group?           | No.                                                                                                |
| 21. Duration                           | What was the duration of the interviews or focus group?                           | See manuscript in the method section/<br><i>data collection – The FGDs</i> .                       |
| 22. Data saturation                    | Was data saturation discussed?                                                    | See manuscript in the method section/<br><i>data collection – The FGDs</i> .                       |
| 23. Transcripts returned               | Were transcripts returned to participants for comment and/or correction?          | No.                                                                                                |
| <b>Domain 3: analysis and findings</b> |                                                                                   |                                                                                                    |
| <i>Data analysis</i>                   |                                                                                   |                                                                                                    |

|                                    |                                                                                                                                 |                                                                                                                                                                     |
|------------------------------------|---------------------------------------------------------------------------------------------------------------------------------|---------------------------------------------------------------------------------------------------------------------------------------------------------------------|
| 24. Number of data coders          | How many data coders coded the data?                                                                                            | Two, SA and LÖL.                                                                                                                                                    |
| 25. Description of the coding tree | Did authors provide a description of the coding tree?                                                                           | Yes, a description was provided to the coauthors.                                                                                                                   |
| 26. Derivation of themes           | Were themes identified in advance or derived from the data?                                                                     | See manuscript in the method section/ <i>data analysis</i> .                                                                                                        |
| 27. Software                       | What software, if applicable, was used to manage the data?                                                                      | No software was used.                                                                                                                                               |
| 28. Participant checking           | Did participants provide feedback on the findings?                                                                              | No.                                                                                                                                                                 |
| <i>Reporting</i>                   |                                                                                                                                 |                                                                                                                                                                     |
| 29. Quotations presented           | Were participant quotations presented to illustrate the themes/findings? Was each quotation identified? e.g. participant number | See manuscript in the result section.                                                                                                                               |
| 30. Data and findings consistent   | Was there consistency between the data presented and the findings?                                                              | Yes.                                                                                                                                                                |
| 31. Clarity of major themes        | Were major themes clearly presented in the findings?                                                                            | Yes.                                                                                                                                                                |
| 32. Clarity of minor themes        | Is there a description of diverse cases or discussion of minor themes?                                                          | Yes, the FGD findings are thoroughly presented in the Additional files 1-6 and diversions are presented in the result section and the discussion of the manuscript. |
